# Supplementary material for: Synthesis of quantum dot-based polymer nanocomposites: assessment of their thermoelectric performances
Source: Royal Society of Chemistry journal article supplement (doi:10.1039/d2se00403h), 2022-01-01
Supplement: d2se00403h1.pdf [file d2se00403h1.pdf]

## Supporting information

### Synthesis of Quantum Dot-Based Polymer Nanocomposites: Assessment of Their Thermoelectric Performances

*Shivani Shisodia*<sup>a\*</sup>, *Benoit Duponchel*<sup>a</sup>, *Gérard Leroy*<sup>b</sup>, *Abdelhak Hadj Sahraoui*<sup>a</sup>, *Dharmendra Pratap Singh*<sup>b</sup>, *Christophe Poupin*<sup>c</sup>, *Lucette Tidahy*<sup>c</sup>, *Renaud Cousin*<sup>c</sup>, *Patrick Ropa*<sup>b</sup>, *Michael Depriester*<sup>a</sup>

#### Mobility and charge carrier concentration calculation:

The dielectric properties of the TQDGO/PEDOT: PSS pellets in the low frequency region is shown in figure 1. These properties were analyzed using the Uemura model by using<sup>1-3</sup>:

$$\varepsilon'(f) = A.f^{3/2} + B$$

$$\varepsilon''(f) = C.f^{-1}$$

$$\text{Where } A = \frac{2 n q^2 D^{3/2}}{\varepsilon_0 \sqrt{\pi} d k_B T}, B = \varepsilon_\infty, \text{ and } C = \frac{2 n q^2 D}{\varepsilon_0 k_B T}$$

Dividing the coefficient A by C, we can calculate the diffusion constant, D, by:

$$D = \left(\frac{A}{C}\right)^2 \pi d^2$$

The charge carrier concentration, n, is calculated by:

$$n = \frac{C \varepsilon_0 k_B T}{2q^2 D}$$

And finally the mobility,  $\mu$ , was calculated from  $\mu = \frac{\sigma}{n q}$

Where, f is the frequency, q is the electronic charge,  $k_B$  is the Boltzmann constant,  $\varepsilon_0$  is the permittivity of free space, T is the absolute temperature, d is the sample thickness. The values of the constant A, B, C and the diffusion constant, D, charge carrier concentration, n, and mobility,  $\mu$ , are given in the table 1.

*SI Table 1: The calculated values of the constants A, B, C, dielectric constant (D), carrier concentration (n), and mobility ( $\mu$ ) of the TQDGO/PEDOT: PSS pellets.*

| TQDGO wt. % | A                   | B      | C                   | D (m <sup>2</sup> .s) | n (m <sup>-3</sup> ) | $\mu$ (m <sup>2</sup> .V <sup>-1</sup> .s <sup>-1</sup> ) |
|-------------|---------------------|--------|---------------------|-----------------------|----------------------|-----------------------------------------------------------|
| 0%          | 3.96 e <sup>4</sup> | 0.0015 | 1.73 e <sup>5</sup> | 7.14 e <sup>-9</sup>  | 1.74 e <sup>19</sup> | 6.101 e <sup>-5</sup>                                     |
| 1%          | 1.79 e <sup>5</sup> | 0.02   | 3.37 e <sup>6</sup> | 2.02 e <sup>-9</sup>  | 1.19 e <sup>21</sup> | 3.04 e <sup>-4</sup>                                      |
| 2%          | 1.09 e <sup>6</sup> | 0.132  | 6.07 e <sup>7</sup> | 1.6 e <sup>-10</sup>  | 6.18 e <sup>22</sup> | 3.71 e <sup>-4</sup>                                      |

|    |                      |       |                       |                      |                       |                      |
|----|----------------------|-------|-----------------------|----------------------|-----------------------|----------------------|
| 5% | $9.7 \times 10^{-5}$ | 0.043 | $4.84 \times 10^{-7}$ | $5.9 \times 10^{-9}$ | $5.8 \times 10^{-21}$ | $1.0 \times 10^{-2}$ |
|----|----------------------|-------|-----------------------|----------------------|-----------------------|----------------------|

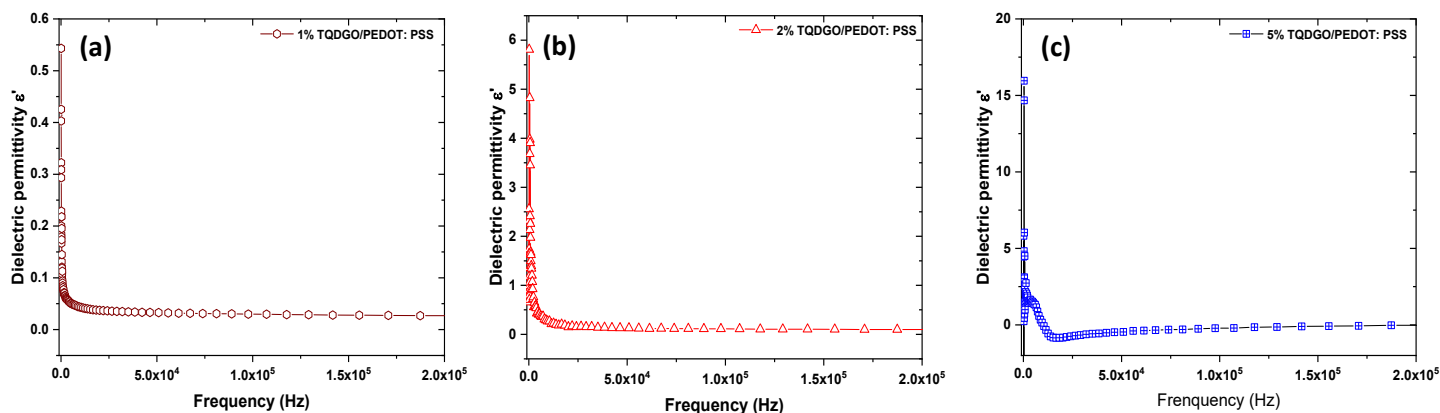

SI Figure 1: Dielectric permittivity as a function of frequency for (a) 1%, (b) 2%, and (c) 5% TQDGO/PEDOT: PSS pellets.

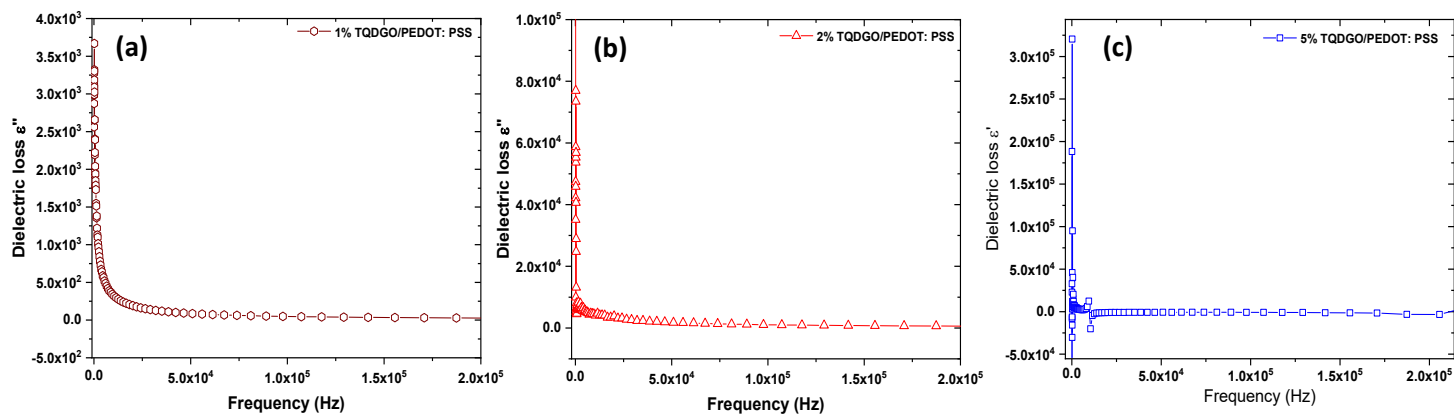

SI Figure 2: Dielectric loss as a function of frequency for (a) 1%, (b) 2%, and (c) 5% TQDGO/PEDOT: PSS pellets.

### Thermoelectric properties of ethylene glycol treated TQDGO/PEDOT: PSS pellets

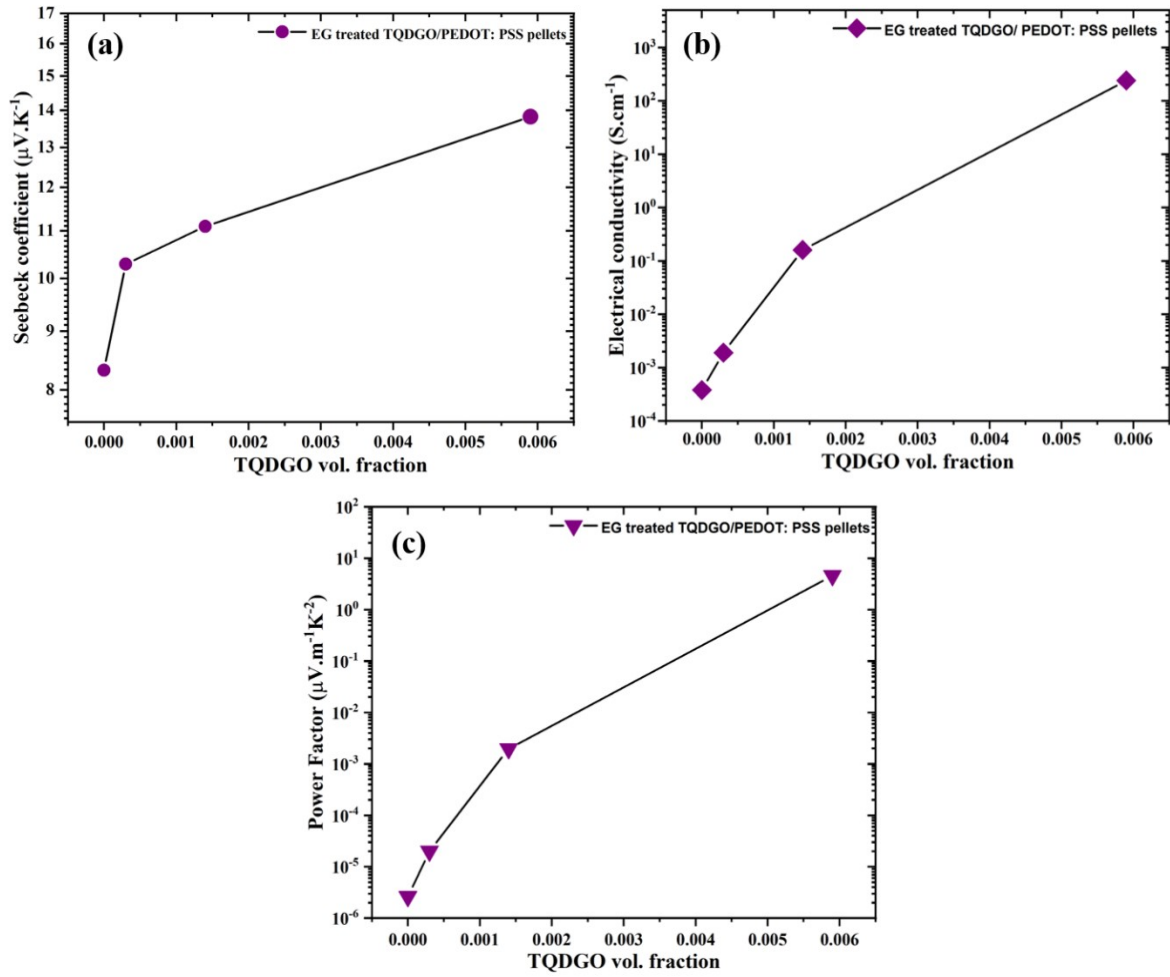

SI Figure 3: (a) Seebeck coefficient, (b) Electrical conductivity, and (c) Power factor of ethylene glycol treated TQDGO/PEDOT: PSS pellets as a function of TQDGO vol. fraction.

### Effect of aging (1 year in ambient environment):

The FTIR and Seebeck coefficient measurements have been done to test the stability of the samples. The samples were kept in an ambient environment for 1 year for the aging process (in North Europe climate).

1. **FTIR:** The FTIR showed a broad hump corresponding to the OH group. This indicates that the samples have absorbed the environmental water due to the humidity.

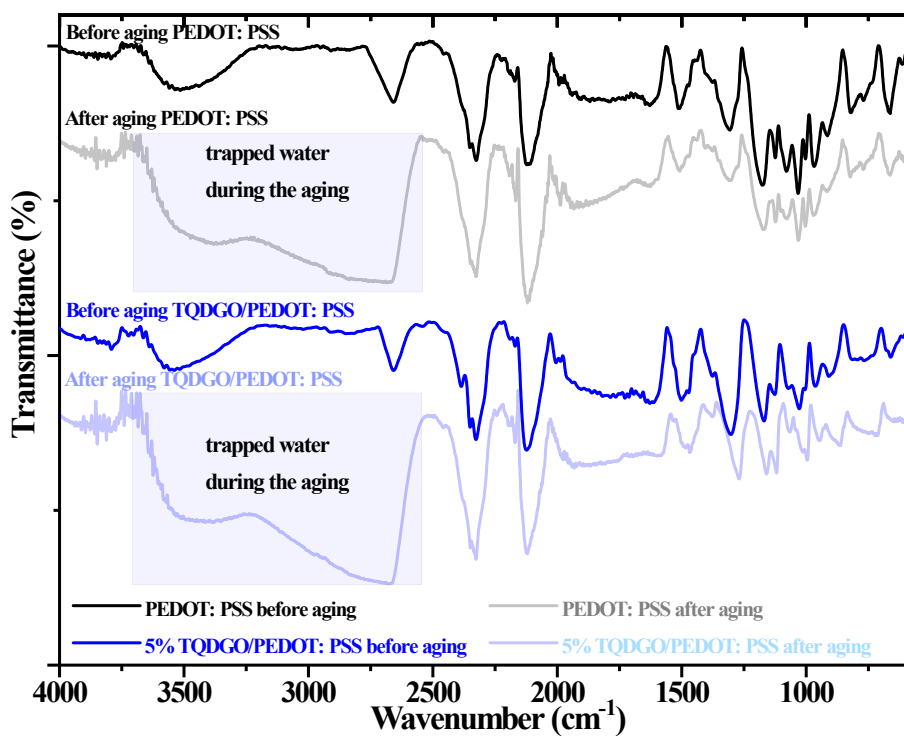

SI Figure 4: FTIR of PEDOT: PSS and TQDGO/ PEDOT: PSS before and after aging in ambient environment.

2. **Seebeck coefficient measurements:** The Seebeck coefficient measurement shows that the performance of the 5% TQDGO/PEDOT: PSS has decreased from 37 to 27.67  $\mu\text{V}/\text{K}$  (32.43 %). It may be due to the FTIR-observed trapped water.

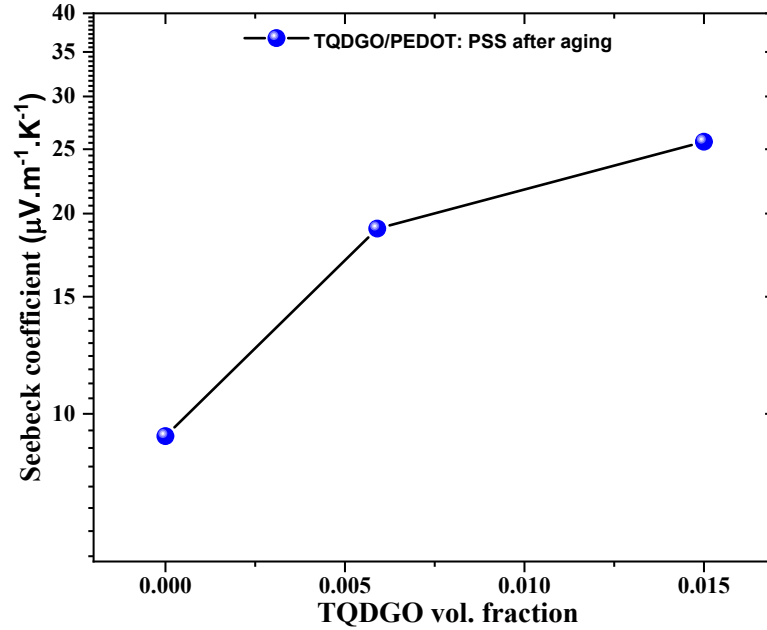

SI Figure 5: Long term stability performance of TQDGO/PEDOT: PSS pellets Seebeck coefficient as a function of TQDGO vol. fraction.

### References:

1. S. Uemura, *J. Polym. Sci. Part -2 Polym. Phys.*, 1972, **10**, 2155–2166.
2. S. Uemura, *J. Polym. Sci. Polym. Phys. Ed.*, 1974, **12**, 1177–1188.
3. B. P. Singh, S. Sikarwar, K. K. Pandey, R. Manohar, M. Depriester and D. P. Singh, *Electron. Mater.*, 2021, **2**, 466–481.
